# Supplementary material for: A green and facile strategy for the low-temperature and rapid synthesis of Li2S@PC–CNT cathodes with high Li2S content for advanced Li–S batteries
Source: Royal Society of Chemistry journal article supplement (doi:10.1039/c8ta01342j), 2018-01-01
Supplement: c8ta01342j1.pdf [file c8ta01342j1.pdf]

## Supplementary Information

### **A Green and Facile Strategy for the Low-Temperature Rapid Synthesis of Li<sub>2</sub>S@PC-CNT Cathodes with High Li<sub>2</sub>S Content in Advanced Li-S Batteries**

Sheng Liang,<sup>†a</sup> Yang Xia,<sup>†a</sup> Chu Liang,<sup>\*a</sup> Yongping Gan,<sup>a</sup> Hui Huang,<sup>a</sup> Jun Zhang,<sup>a</sup> Xinyong Tao,<sup>a</sup> Wei Sun,<sup>b</sup> Weiqiang Han<sup>c</sup> and Wenkui Zhang,<sup>\*a</sup>

<sup>a</sup> College of Materials Science and Engineering, Zhejiang University of Technology, Hangzhou 310014, People's Republic of China

<sup>b</sup> Zhejiang Tianneng Energy Technology Co., Ltd, Huzhou, 313100, People's Republic of China

<sup>c</sup> School of Materials Science and Engineering, Zhejiang University, Hangzhou, 310027, People's Republic of China

<sup>†</sup> These authors contributed equally to this work.

\* Corresponding authors: [cliang@zjut.edu.cn](mailto:cliang@zjut.edu.cn) (C. Liang), [msechem@zjut.edu.cn](mailto:msechem@zjut.edu.cn) (W. Zhang).

### **Table of Contents**

1. Figures
2. Tables
3. Notes and references

## 1. Figures

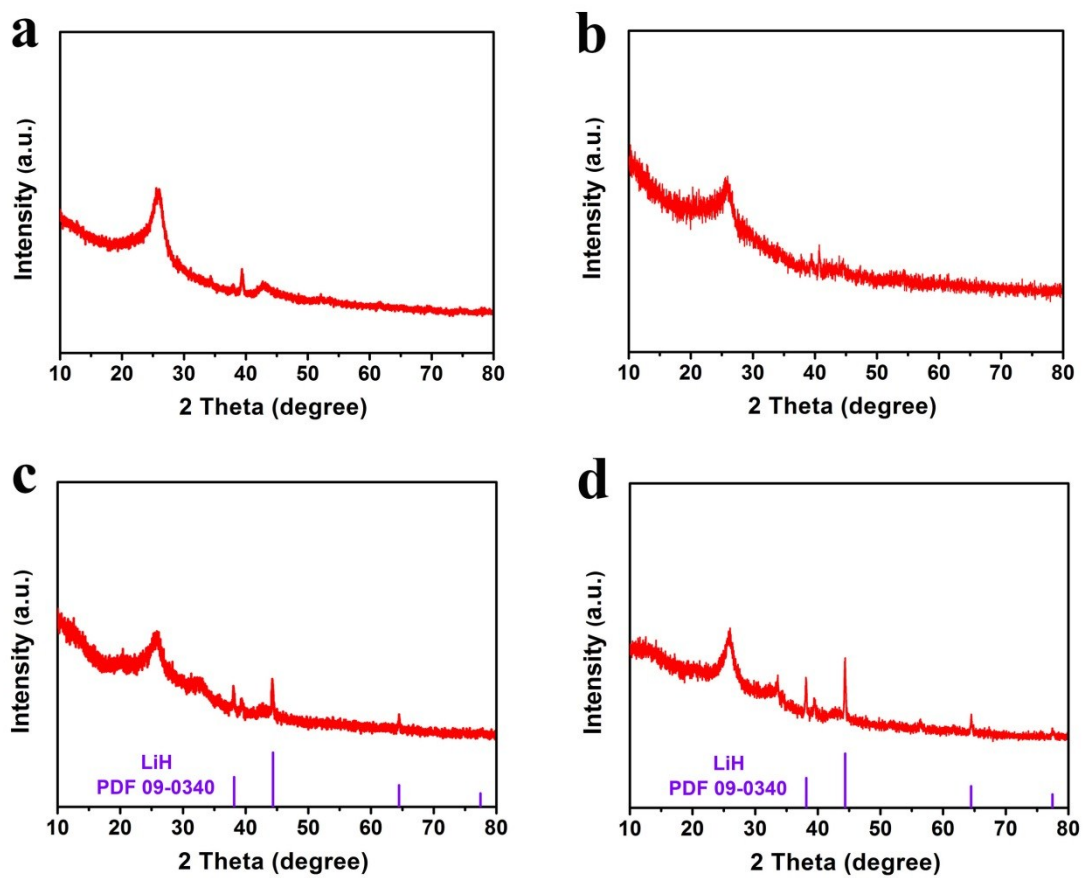

**Fig. S1.** XRD patterns of (a) CNT, (b) the solid residue of CNT–CS<sub>2</sub> mixture after heating to 330 °C, (c) the mixture of CNT–LiH, (d) the product of CNT–LiH after heating to 330 °C.

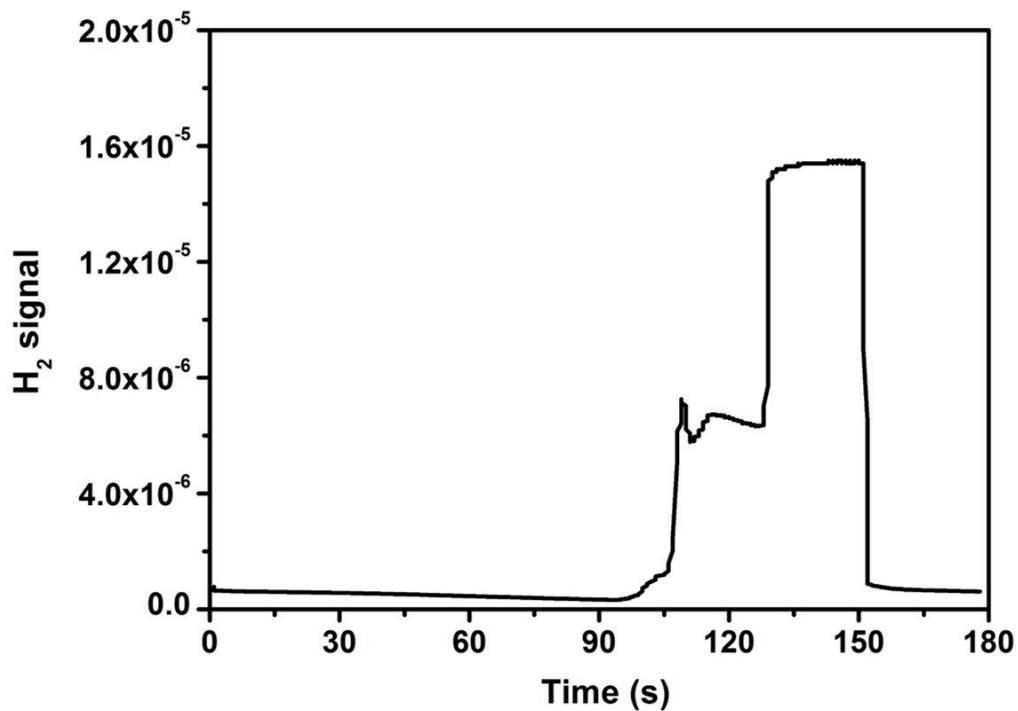

**Fig. S2.** Hydrogen signal of the gaseous products generated from the reaction between LiH and CS<sub>2</sub>.

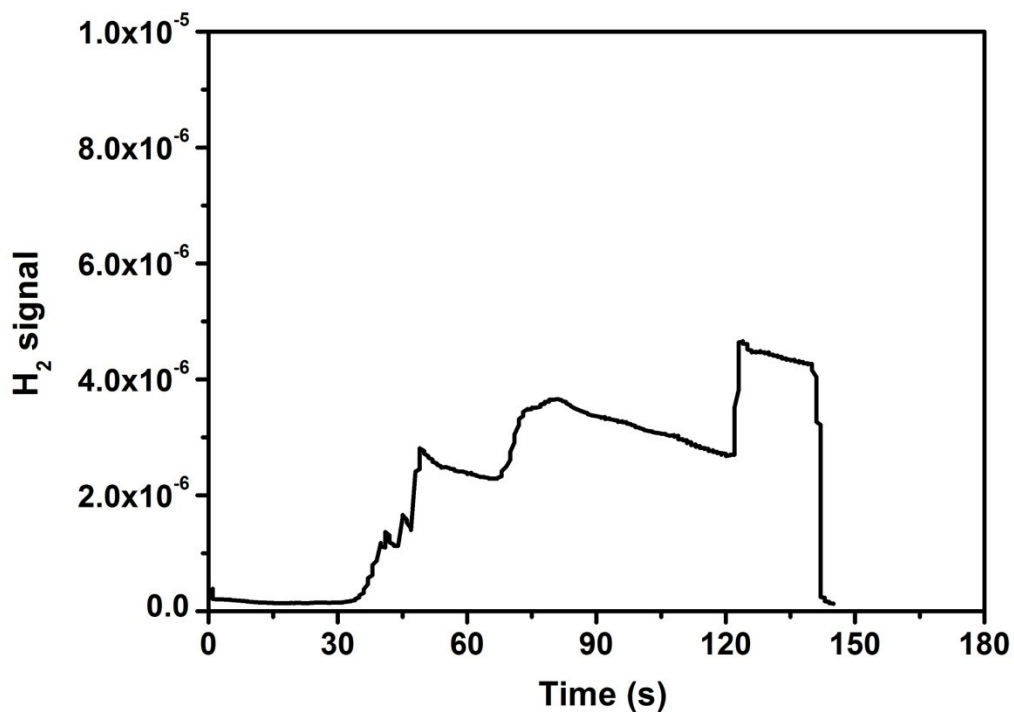

**Fig. S3.** Hydrogen signal of the gaseous products generated from the reaction between LiH-CNT mixture and CS<sub>2</sub>.

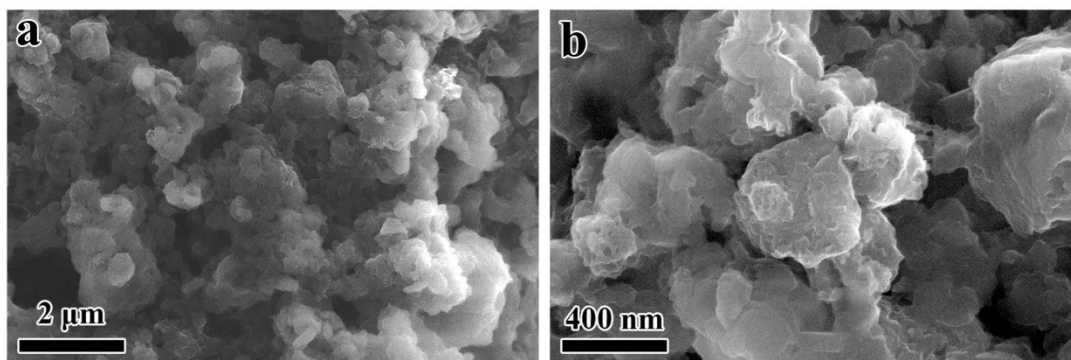

**Fig. S4.** FESEM images of  $\text{Li}_2\text{S}@PC$  composites. (a) low-magnification image; (b) High-magnification image.

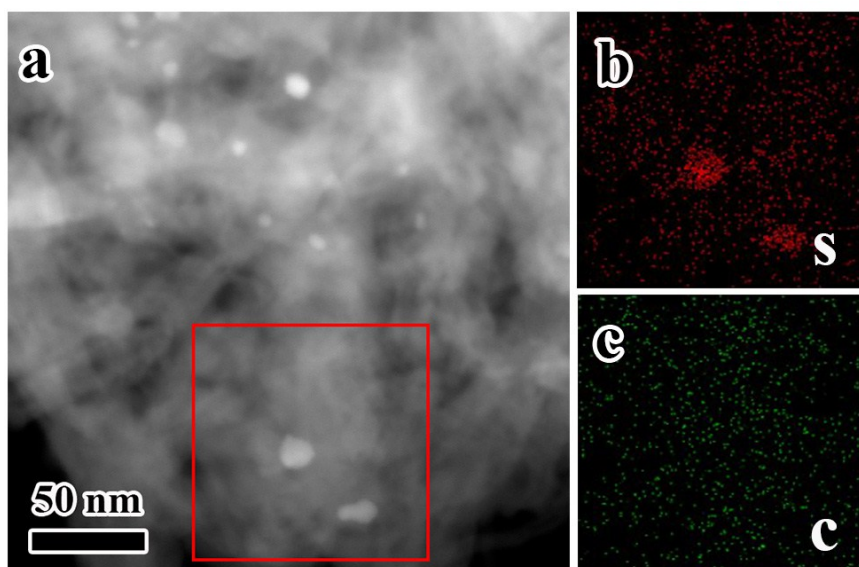

**Fig. S5** (a) STEM images of  $\text{Li}_2\text{S}@PC\text{-CNT}$ . (b-c) EDS sulfur and carbon mapping of the square denoted in (a).

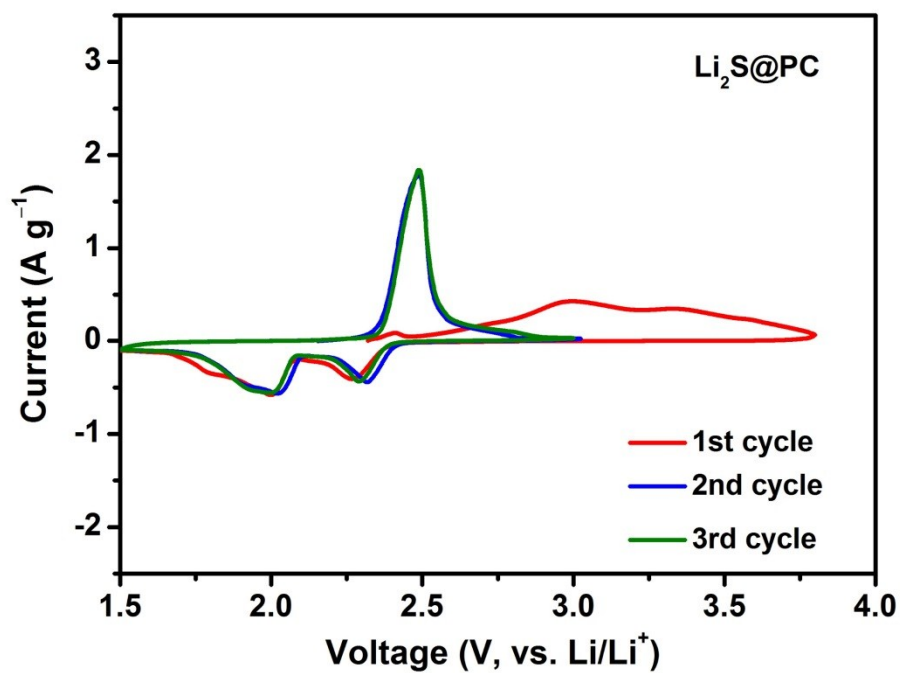

Fig. S6. CV curves of  $\text{Li}_2\text{S}@PC$  electrode.

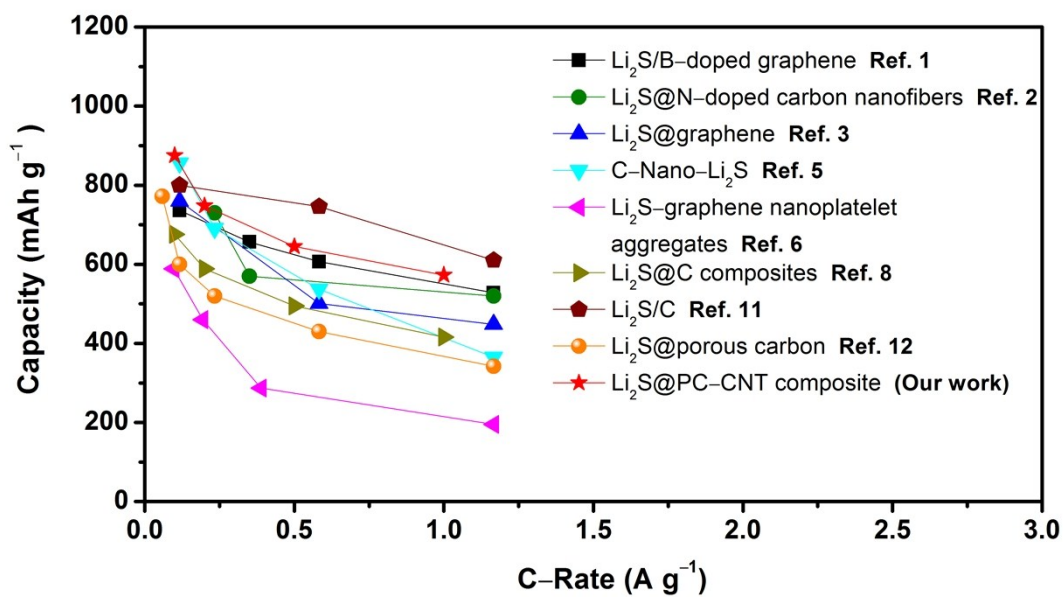

Fig. S7. Rate capability of  $\text{Li}_2\text{S}@PC\text{-CNT}$  and other  $\text{Li}_2\text{S}$ -carbon electrodes.

## 2. Tables

**Table S1.** Weight percent of elements in Li<sub>2</sub>S, Li<sub>2</sub>S@PC and Li<sub>2</sub>S@PC–CNT.

| Sample                   | C (wt.%) | H (wt.%) | S (wt.%) | Li (wt.%) |
|--------------------------|----------|----------|----------|-----------|
| Li <sub>2</sub> S        | 0.1      | 0.4      | 69.5     | 30.0      |
| Li <sub>2</sub> S@PC     | 11.3     | 0.4      | 61.6     | 26.7      |
| Li <sub>2</sub> S@PC–CNT | 31.5     | 0.3      | 47.6     | 20.6      |

**Table S2.** The values of standard enthalpy of the formation for related compounds from the elements

| Related compounds                                      | LiH (s) | Li <sub>2</sub> S (s) | CS <sub>2</sub> (g) | H <sub>2</sub> | C |
|--------------------------------------------------------|---------|-----------------------|---------------------|----------------|---|
| Standard enthalpy of formation (kJ mol <sup>-1</sup> ) | -90.5   | -441.4                | 116.7               | 0              | 0 |

**Table S3.** Comparison of the electrochemical performance of various Li<sub>2</sub>S–carbon cathodes for lithium–sulfur batteries.

| Li <sub>2</sub> S–carbon electrodes                | Current Density (mA g <sup>-1</sup> ) | Capacity (mAh g <sup>-1</sup> ) @ cycles number | Component content on current collector (wt %) |              | mass loading                                    | Ref.     |
|----------------------------------------------------|---------------------------------------|-------------------------------------------------|-----------------------------------------------|--------------|-------------------------------------------------|----------|
|                                                    |                                       |                                                 | Li <sub>2</sub> S                             | Total carbon |                                                 |          |
| Li <sub>2</sub> S/N–doped graphene                 | 583                                   | 403@300                                         | 55–50                                         | 44.6–49.5    | 2 mg cm <sup>-2</sup> (Li <sub>2</sub> S)       | 1        |
| Li <sub>2</sub> S/B–doped graphene                 |                                       | 357@300                                         |                                               | 39.9–44.3    |                                                 |          |
| Li <sub>2</sub> S@N–doped carbon nanofibers        | 233.2                                 | 598@50                                          | 50.6                                          | 47           | 3 mg cm <sup>-2</sup>                           | 2        |
| Li <sub>2</sub> S@graphene                         | 583                                   | 256@300                                         | 36.4                                          | 38.2         | 2 mg cm <sup>-2</sup> (Li <sub>2</sub> S)       | 3        |
| Li <sub>2</sub> S@Ni–P@ graphene                   |                                       | 490@300                                         |                                               |              |                                                 |          |
| Li <sub>2</sub> S@Ni–S@ graphene                   |                                       | 425@300                                         |                                               |              |                                                 |          |
| Li <sub>2</sub> S@Ni–P–S@ graphene                 |                                       | 540@300                                         |                                               |              |                                                 |          |
| MWCNT (20wt.%)–linked Li <sub>2</sub> S            | 583                                   | 501@100                                         | 40                                            | 45           | 1 mg cm <sup>-2</sup>                           | 4        |
| C–Nano–Li <sub>2</sub> S                           | 116.6                                 | 648@50                                          | 54.2                                          | 35.8         | 2.5–3 mg cm <sup>-2</sup>                       | 5        |
| Li <sub>2</sub> S–graphene nanoplatelet aggregates | 97.2                                  | 508@40                                          | 60                                            | 30           | 0.5 mg cm <sup>-2</sup>                         | 6        |
| Li <sub>2</sub> S/GO@C                             | 233.2                                 | 683@50                                          | 60                                            | 35           | 0.7–0.9 mg cm <sup>-2</sup> (Li <sub>2</sub> S) | 7        |
| Li <sub>2</sub> S@C composites                     | 100                                   | 433@200                                         | 46.5                                          | 43.5         | 1 mg cm <sup>-2</sup>                           | 8        |
| Li <sub>2</sub> S/N <sub>3</sub> P–C               | 583                                   | 520@100                                         | 62                                            | 33.3         | 2 mg cm <sup>-2</sup> (Li <sub>2</sub> S)       | 9        |
| Li <sub>2</sub> S@graphene nanocapsules            | 160                                   | 530@200                                         | 80                                            | 15           | 2 mg cm <sup>-2</sup>                           | 10       |
| Li <sub>2</sub> S/C                                | 116.6                                 | 570@200                                         | 55.5                                          | 34.5         | 3.3–3.5 mg cm <sup>-2</sup> (Li <sub>2</sub> S) | 11       |
| Li <sub>2</sub> S@porous carbon                    | 1166                                  | 252@200                                         | 56                                            | 34           | 1.0 mg cm <sup>-2</sup> (Li <sub>2</sub> S)     | 12       |
| Li <sub>2</sub> S@PC–CNT                           | 500                                   | 502@300                                         | 58.2                                          | 31.8         | 1.3 mg cm <sup>-2</sup>                         | our work |
|                                                    | 500                                   | 504@100                                         |                                               |              | 7.5 mg cm <sup>-2</sup>                         |          |
| Li <sub>2</sub> S@PC                               | 500                                   | 320@300                                         | 80.4                                          | 14.6         | 1.3 mg cm <sup>-2</sup>                         |          |
|                                                    | 500                                   | 358@100                                         |                                               |              |                                                 |          |

### 3. Notes and references

- [1] G. Zhou, E. Paek, G.S. Hwang, A. Manthiram, *Adv. Energy Mater.*, 2016, **6**, 1501355.
- [2] M. Yu, Z. Wang, Y. Wang, Y. Dong, J. Qiu, *Adv. Energy Mater.*, 2017, **7**, 1700018.
- [3] G. Zhou, J. Sun, Y. Jin, W. Chen, C. Zu, R. Zhang, Y. Qiu, J. Zhao, D. Zhuo, Y. Liu, X. Tao, W. Liu, K. Yan, H.R. Lee, Y. Cui, *Adv. Mater.*, 2017, **29**, 1603366.
- [4] F. Wu, A. Magasinski, G. Yushin, *J. Mater. Chem. A*, 2014, **2**, 6064–6070.
- [5] L. Suo, Y. Zhu, F. Han, T. Gao, C. Luo, X. Fan, Y.-S. Hu, C. Wang, *Nano Energy*, 2015, **13**, 467–473.
- [6] Z. Li, S. Zhang, C. Zhang, K. Ueno, T. Yasuda, R. Tatara, K. Dokko, M. Watanabe, *Nanoscale*, 2015, **7**, 14385–14392.
- [7] Y. Hwa, J. Zhao, E. Cairns, *Nano Lett.*, 2015, **15**, 3479–3486.
- [8] S. Liang, C. Liang, Y. Xia, H. Xu, H. Huang, X. Tao, Y. Gan, W. Zhang, *J. Power Sources*, 2016, **306**, 200–207.
- [9] J. Zhang, Y. Shi, Y. Ding, L. Peng, W. Zhang and G. Yu, *Adv. Energy Mater.*, 2017, **7**, 1602876.
- [10] G. Tan, R. Xu, Z. Xing, Y. Yuan, J. Lu, J. Wen, C. Liu, L. Ma, C. Zhan, Q. Liu, T. Wu, Z. Jian, R. Shahbazian-Yassar, Y. Ren, D. J. Miller, L. A. Curtiss, X. Ji and K. Amine, *Nat. Energy*, 2017, **2**, 17090.
- [11] X. Li, M. Gao, W. Du, B. Ni, Y. Wu, Y. Liu, C. Shang, Z. Guo and H. Pan, *J. Mater. Chem. A*, 2017, **5**, 6471–6482.
- [12] N. Wang, N. Zhao, C. Shi, E. Liu, C. He, F. He, L. Ma, *Electrochimica Acta*, 2017, **256**, 348–356.
